# Supplementary material for: Revisiting the Flora of Saudi Arabia: Phytochemical and Biological Investigation of the Endangered Plant Species Euphorbia saudiarabica
Source: MDPI journal article supplement (doi:10.3390/metabo13040556), 2023-04-13
Supplement: s1 [file s1]

## **Supplementary Materials:**

### **Revisiting the Flora of Saudi Arabia: Phytochemical and Biological Investigation of an Endangered Plant Species *Euphorbia saudiarabica***

**Omer I. Fantoukh <sup>1,\*†</sup>, Gadah A. Al-Hamoud <sup>1,\*†</sup>, Fahd A. Nasr <sup>1</sup>, Omer M. Almarfadi <sup>1</sup>, Mohammed F. Hawwal <sup>1</sup>, Zulfiqar Ali <sup>2</sup>, Waleed A. Alobaid <sup>1</sup>, Abdulaziz Binawad <sup>1</sup>, Menwer Alrashidi <sup>1</sup>, Fawaz Alasmari <sup>3</sup>, Mohammad Z. Ahmed <sup>1</sup> and Omar M. Noman <sup>1</sup>**

<sup>1</sup> Department of Pharmacognosy, College of Pharmacy, King Saud University, P.O. Box 2457, Riyadh 11451, Saudi Arabia

<sup>2</sup> National Center for Natural Products Research, School of Pharmacy, The University of Mississippi, Oxford, MS 38677, USA

<sup>3</sup> Department of Pharmacology and Toxicology, College of Pharmacy, King Saud University, Riyadh 11451, Saudi Arabia

**\* Authors to whom correspondence should be addressed.**

**† These authors contributed equally to this work.**

## Table of Contents:

**Figure S1:** The  $^1\text{H}$  NMR spectrum of compound **2** in DMSO-d<sub>6</sub>

**Figure S2:** The  $^{13}\text{C}$  NMR spectrum of compound **2** in DMSO-d<sub>6</sub>

**Figure S3:** The DEPT-135 NMR spectrum of compound **2** in DMSO-d<sub>6</sub>

**Figure S4:** The HSQC spectrum of compound **2** in DMSO-d<sub>6</sub>

**Figure S5:** The COSY spectrum of compound **2** in DMSO-d<sub>6</sub>

**Figure S6:** The HMBC spectrum of compound **2** in DMSO-d<sub>6</sub>

**Figure S7:** HR-ESI-MS spectrum of compound **2** in the positive mode

**Figure S8:** HR-ESI-MS spectrum of compound **2** in the negative mode

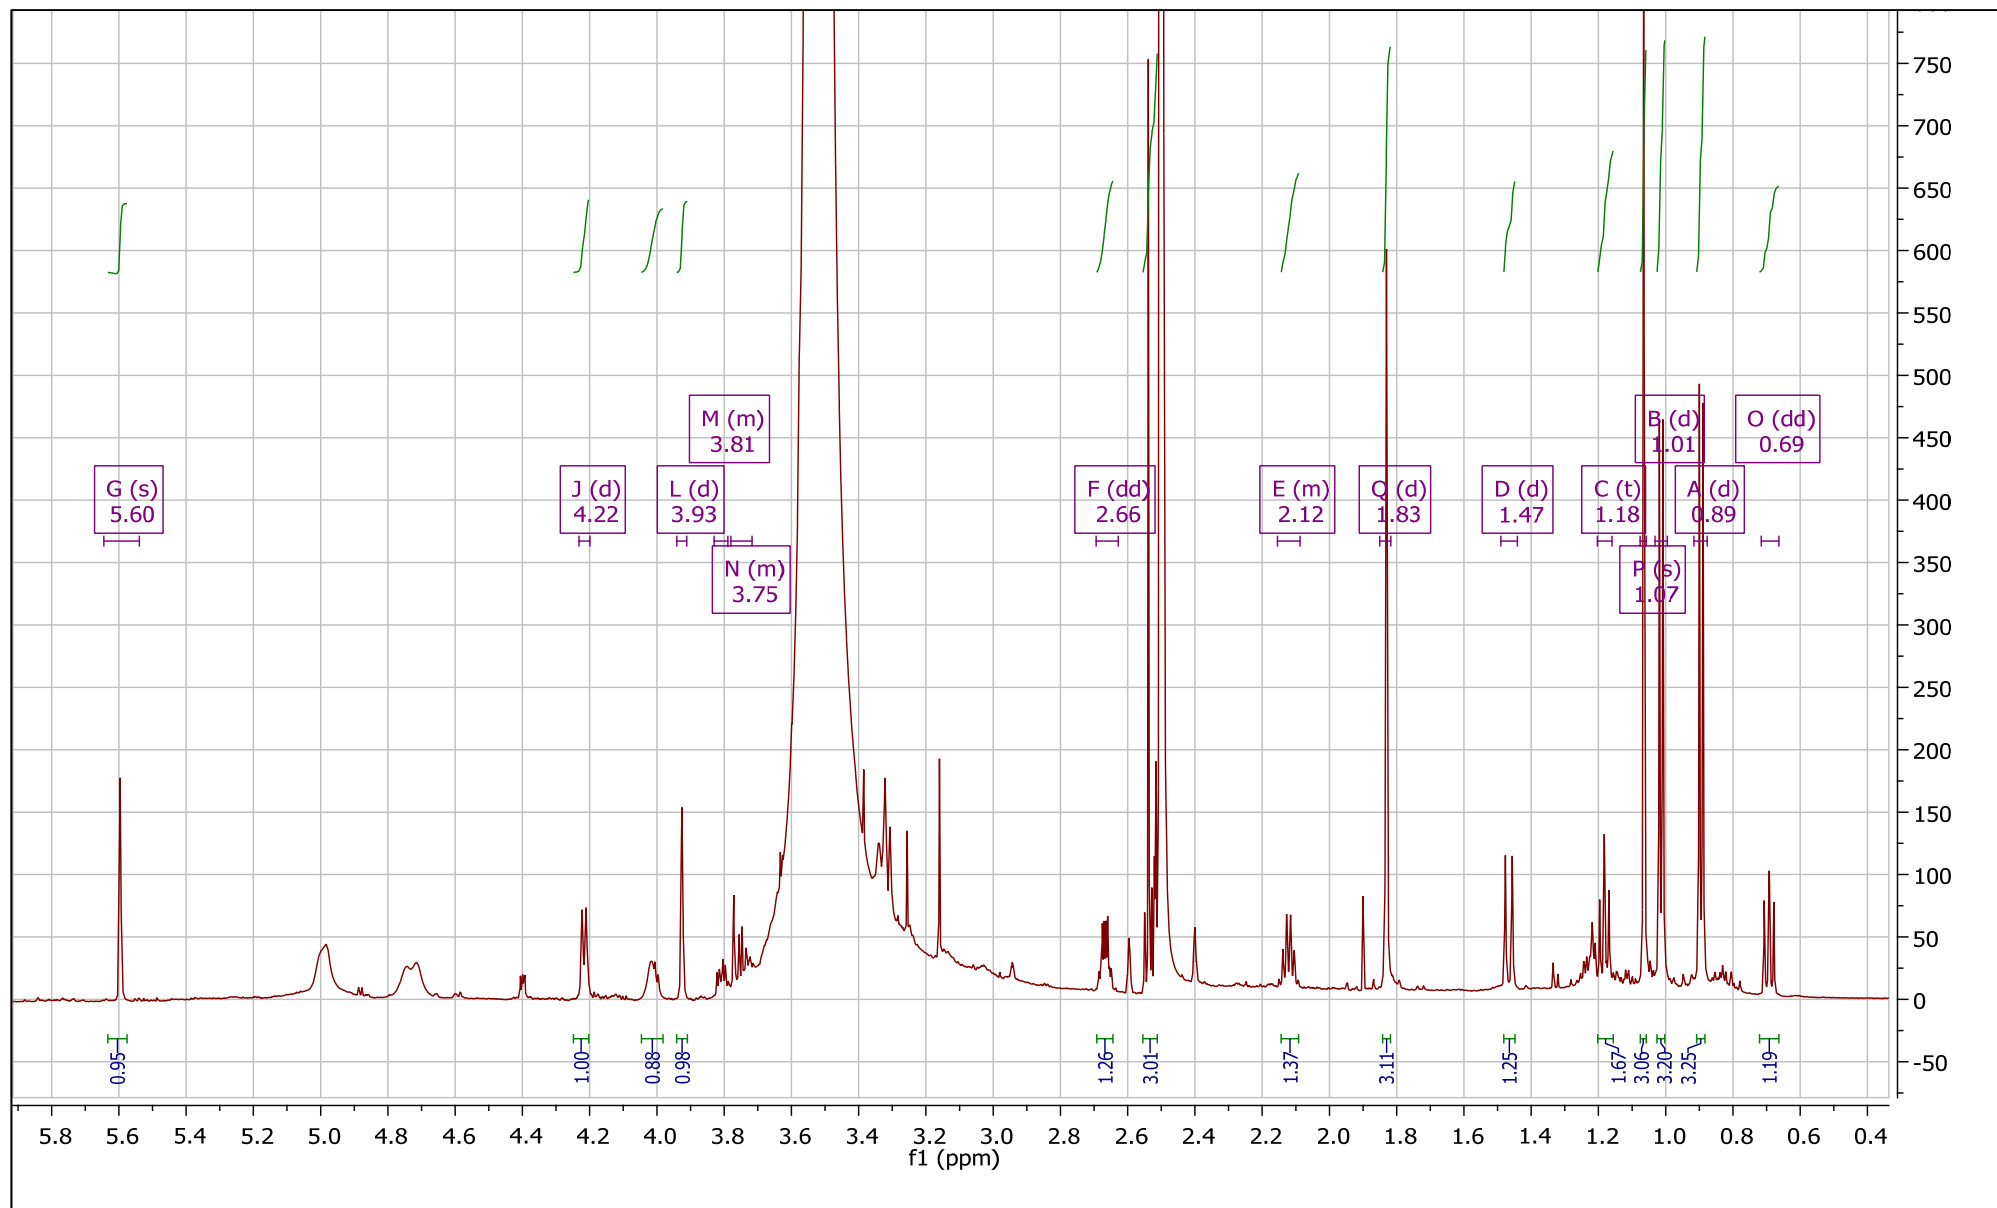

**Figure S1:** The  $^1\text{H}$  NMR spectrum of compound **2** in DMSO- $d_6$

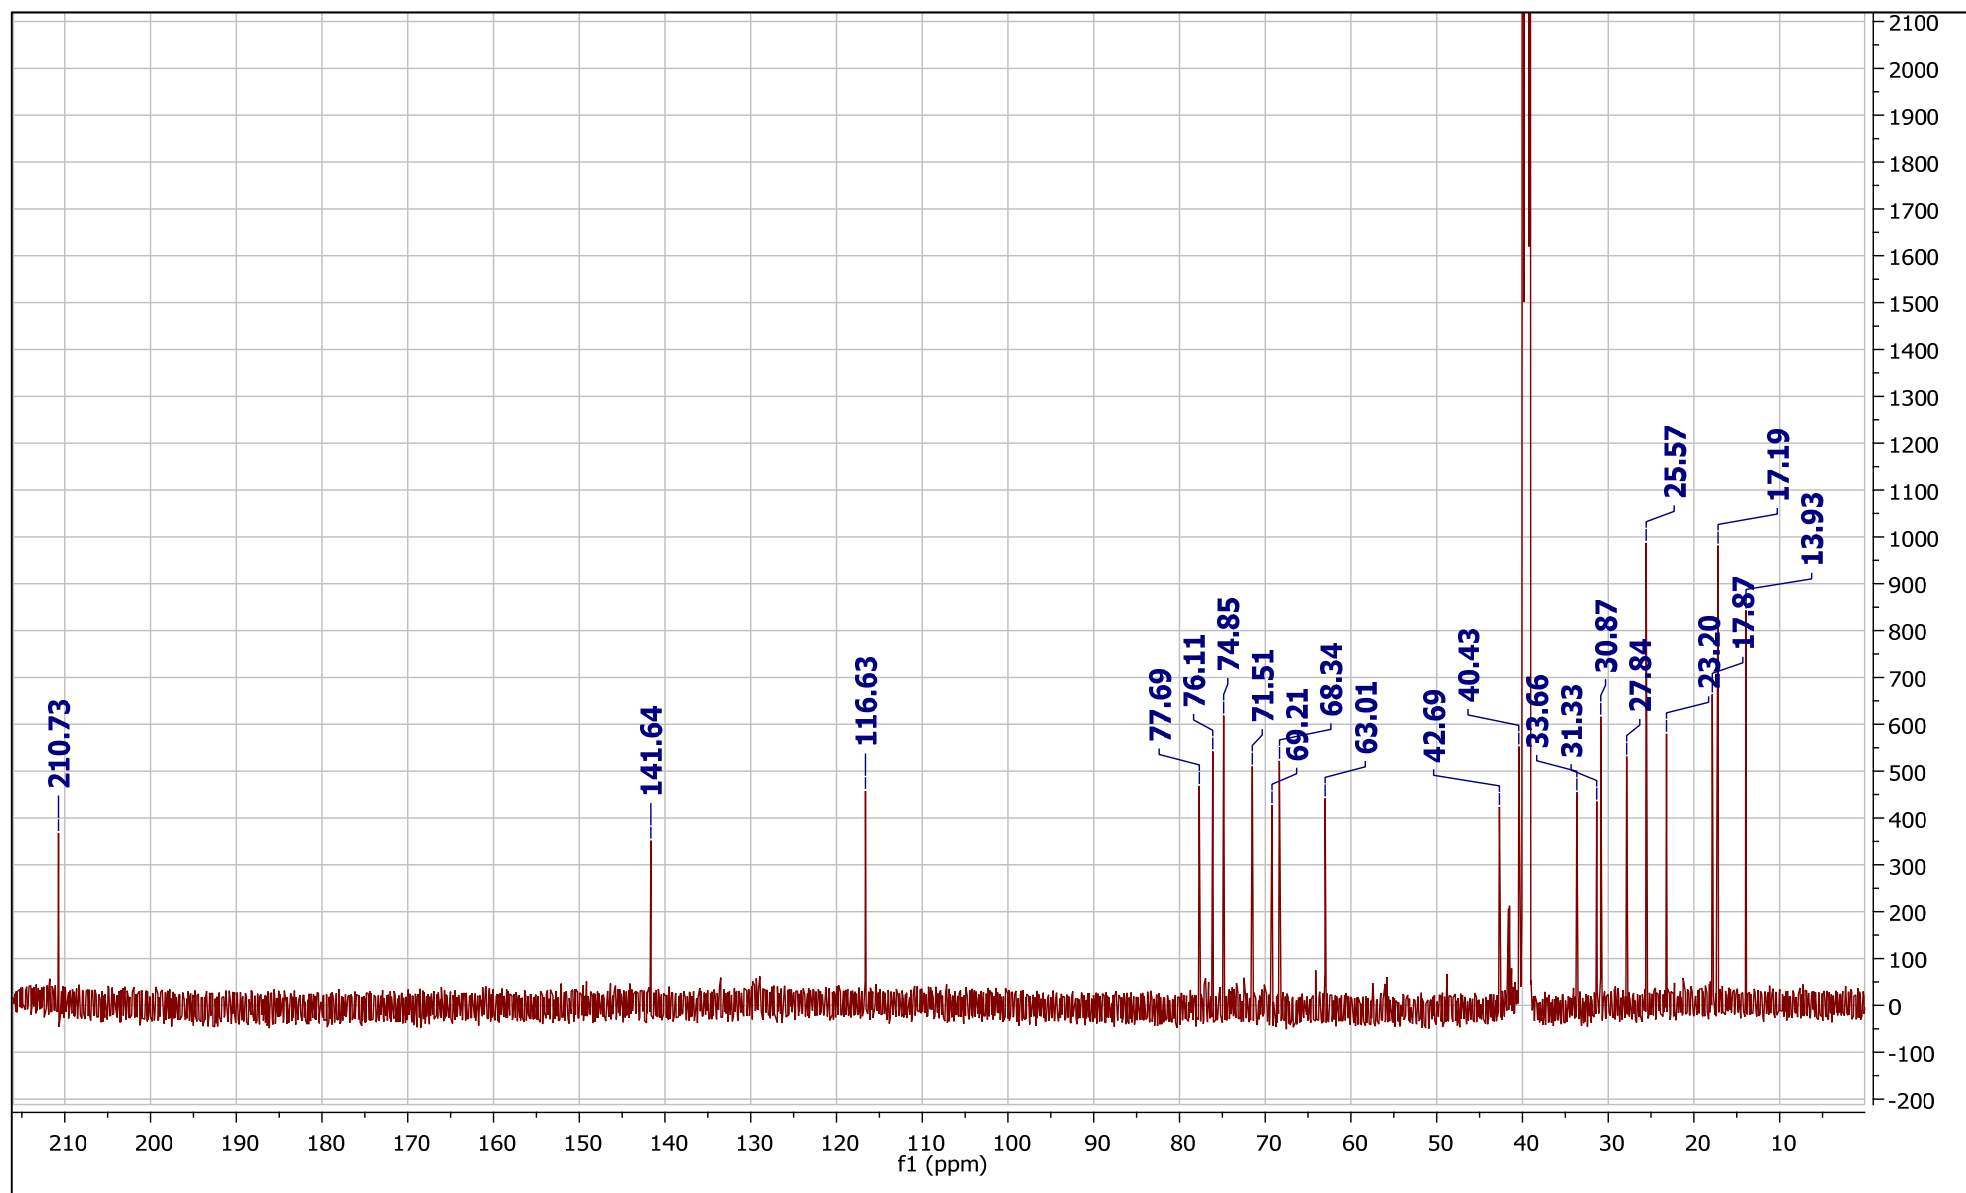

**Figure S2:** The  $^{13}\text{C}$  NMR spectrum of compound **2** in DMSO- $d_6$

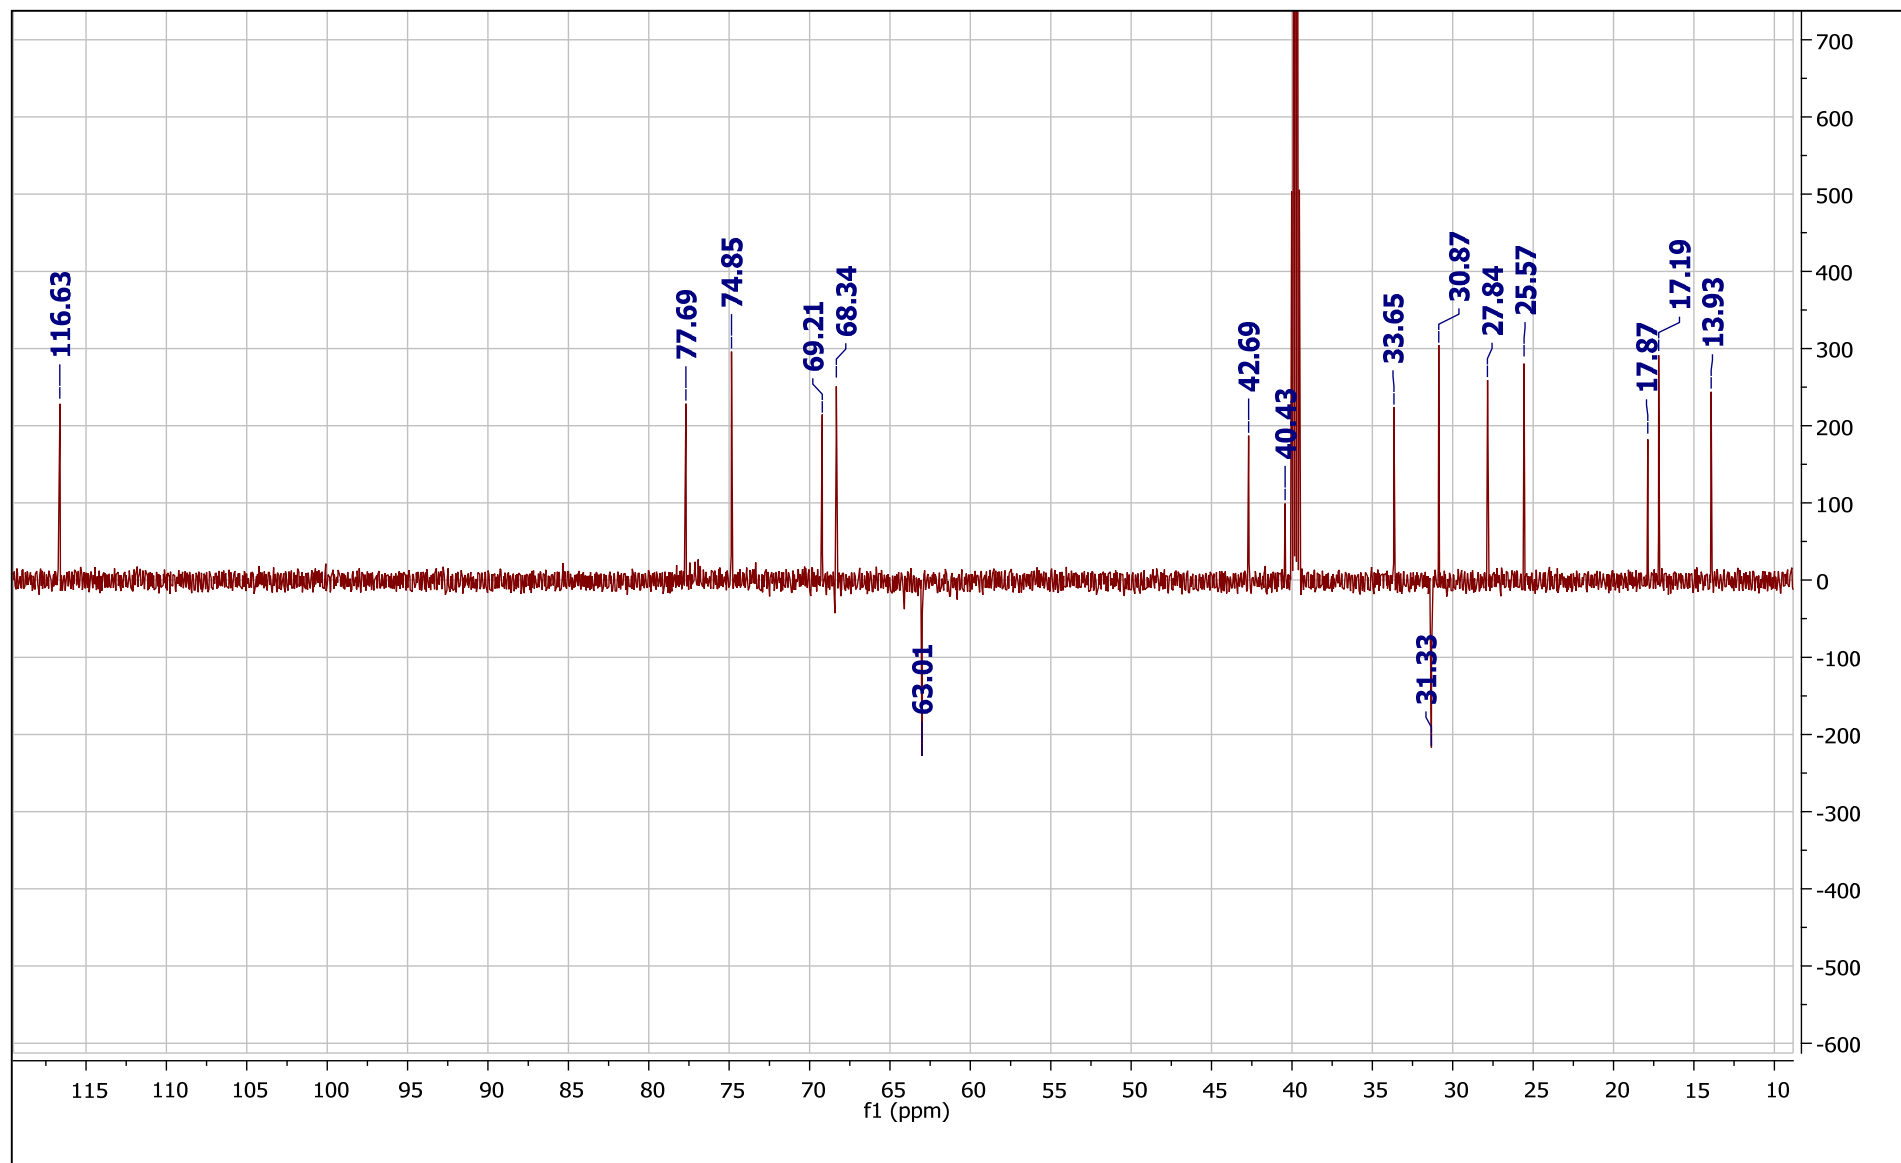

**Figure S3:** The DEPT-135 NMR spectrum of compound **2** in DMSO-d<sub>6</sub>

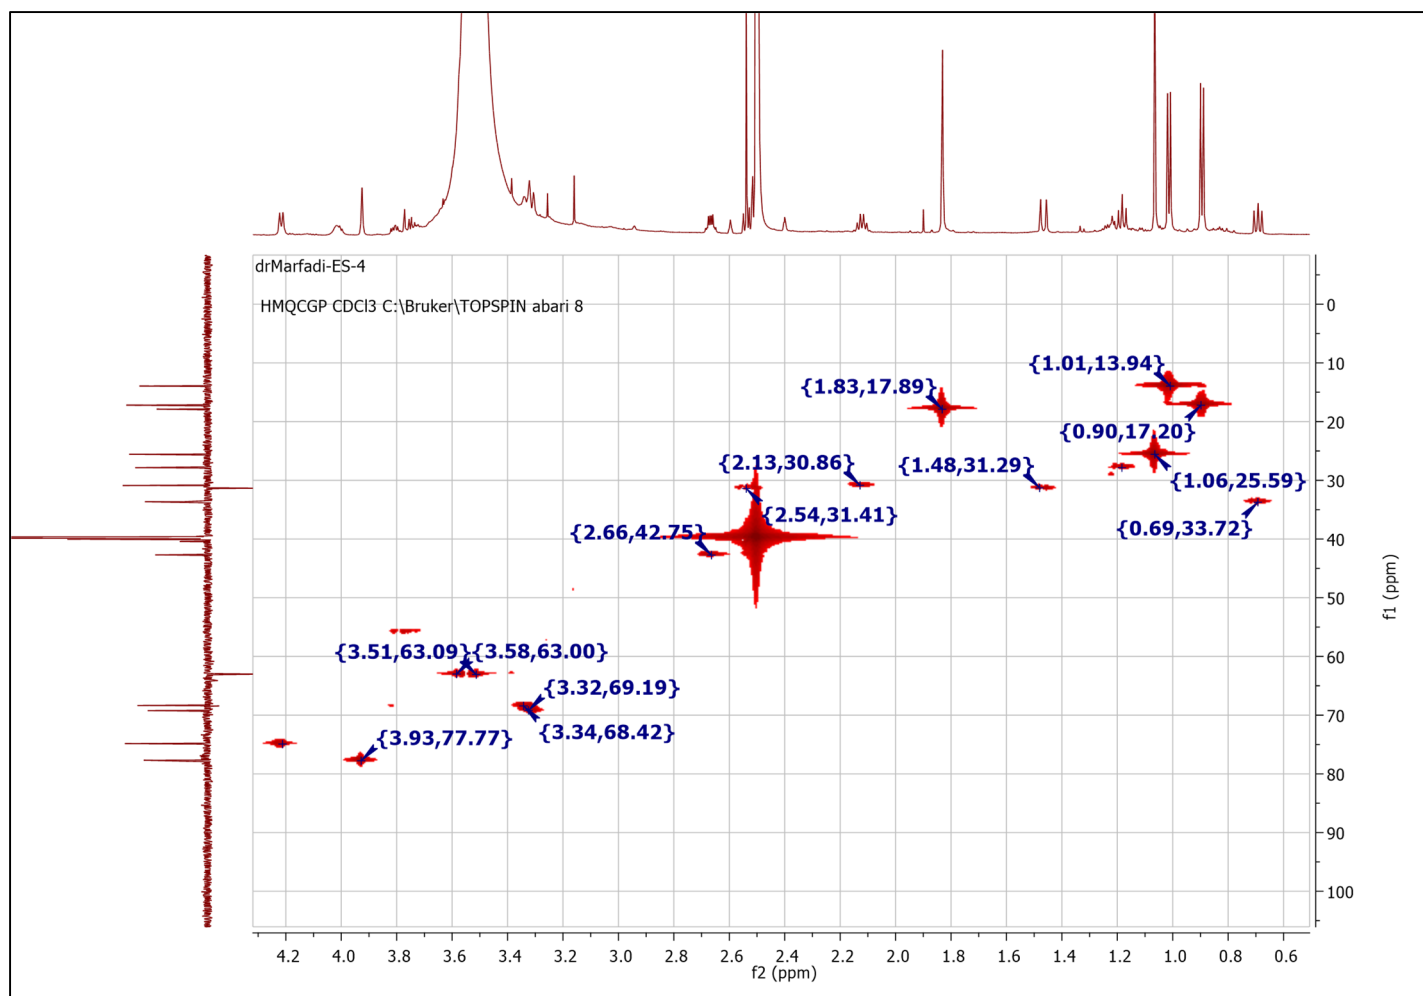

**Figure S4:** The HSQC spectrum of compound **2** in DMSO-d<sub>6</sub>

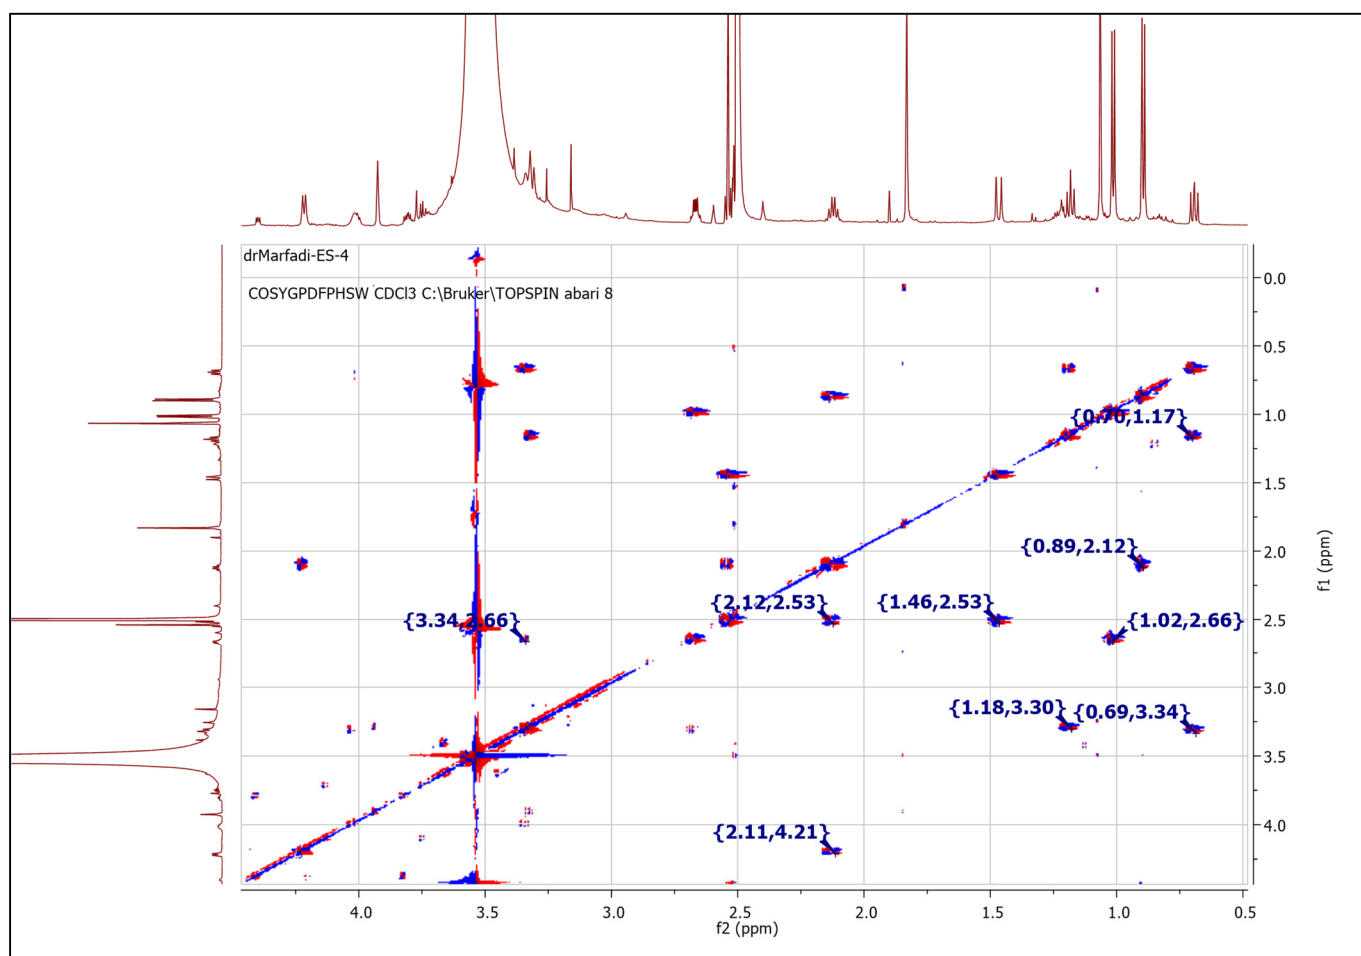

**Figure S5:** The COSY spectrum of compound **2** in DMSO-d<sub>6</sub>





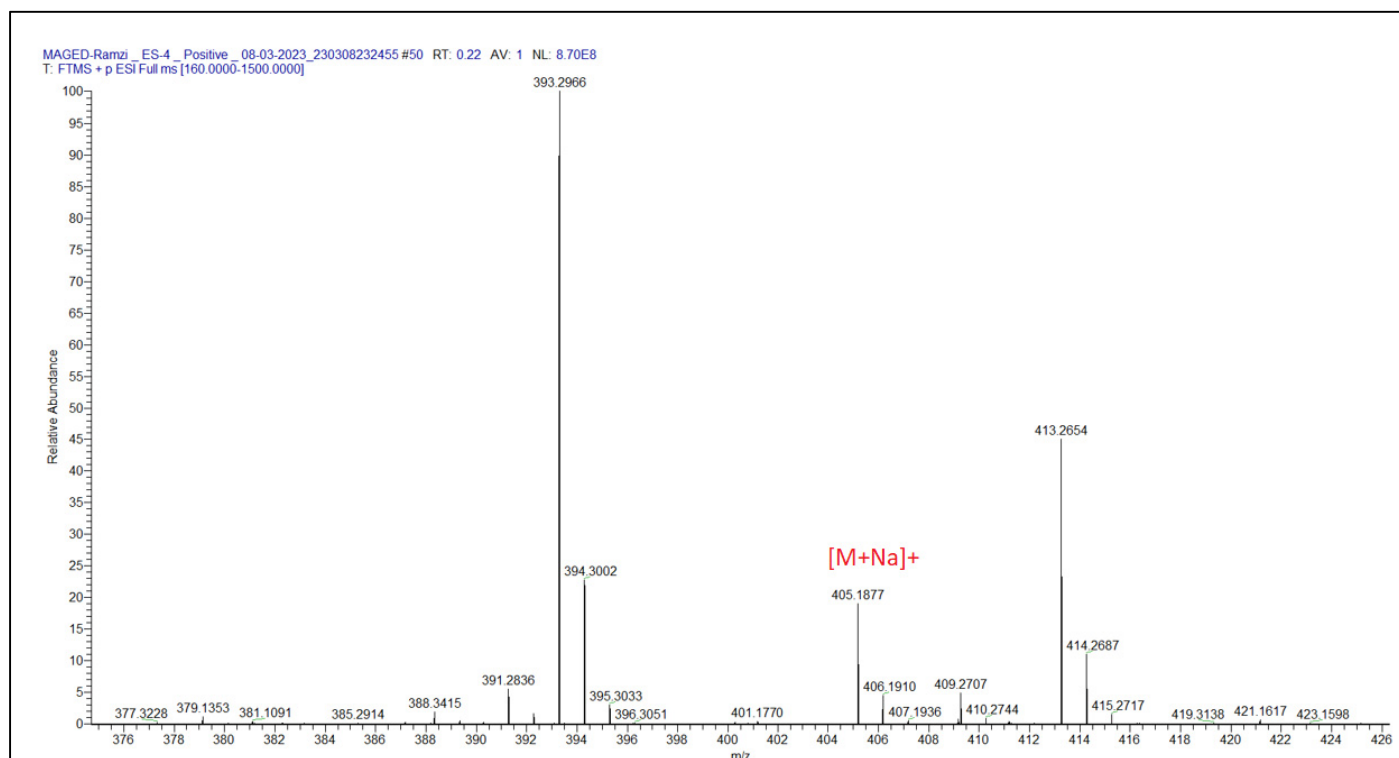

**Figure S7:** HR-ESI-MS spectrum of compound **2** in the positive mode

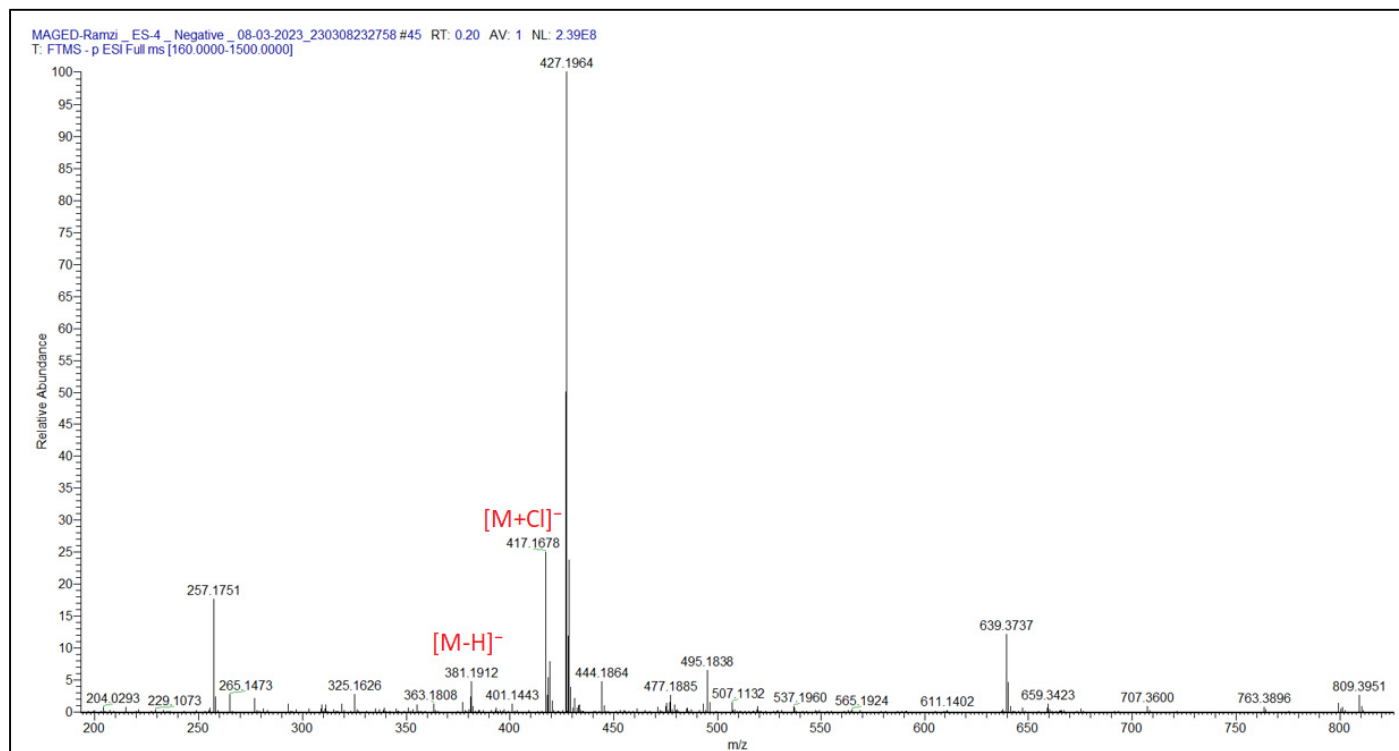

**Figure S8:** HR-ESI-MS spectrum of compound **2** in the negative mode
